# Supplementary material for: Baseline Profile of Participants in the Japan Environment and Children’s Study (JECS)
Source: PubMed Central journal article supplement (PMC5792233; doi:10.2188/jea.je20170018), 2018-02-05
Supplement: je-28-099-s001.pdf [file je-28-099-s001.pdf]

**eTable 1.** Study area of each Regional Centre in the Japan Environment and Children's Study, 2011–2014

| Regional Centres       | Original study area                                                                                                                                                     | Additional study area                                                                                 |
|------------------------|-------------------------------------------------------------------------------------------------------------------------------------------------------------------------|-------------------------------------------------------------------------------------------------------|
| Hokkaido               | Sapporo (Kita-ku and Toyohira-ku), part of Asahikawa, part of Kitami, Oketo, Kunneppu, Tsubetsu and Bihoro                                                              | Remaining part of Asahikawa city (from Sep 2011)                                                      |
| Miyagi                 | Kesenuma, Minamisanriku, Ishinomaki, Onagawa, Osaki, Wakuya, Misato, Kami, Shikama, Kurihara, Tome, Iwanuma, Watari and Yamamoto                                        |                                                                                                       |
| Fukushima              | Fukushima, Minamisoma, Namie, Futaba, Okuma, Katsurao, Tomioka, Naraha, Hirono and Kawauchi                                                                             | Date, Koori, Kunimi, Kawamata (from May 2011) and other areas in Fukushima Prefecture (from Jul 2012) |
| Chiba                  | Kamogawa, Minamiboso, Tateyama, Kyonan, Katsuura, Isumi, Onjuku, Otaki, Kisarazu, Sodegaura, Futtsu, Kimitsu and Chiba (Midori-ku)                                      | Ichinomiya (from Dec 2011)                                                                            |
| Kanagawa               | Yokohama (Kanazawa-ku), Yamato and Odawara                                                                                                                              |                                                                                                       |
| Koshin                 | Kofu, Chuo, Koshu, Yamanashi, Fujiyoshida, Ina, Komagane, Tatsuno, Minowa, Iijima, Minamiminowa, Nakagawa and Miyada                                                    |                                                                                                       |
| Toyama                 | Toyama, Kurobe, Asahi and Nyuzen                                                                                                                                        | Uozu (from Dec 2011) and Namerikawa (from Mar 2013)                                                   |
| Aichi                  | Ichinomiya and Nagoya (Kita-ku)                                                                                                                                         |                                                                                                       |
| Kyoto                  | Kyoto (Sakyou-ku and Kita-ku), Kizugawa and Nagahama                                                                                                                    |                                                                                                       |
| Osaka                  | Kishiwada, Kaizuka, Kumatori, Izumisano, Tajiri, Sennan, Hannan and Misaki                                                                                              | Izumi (from Mar 2013)                                                                                 |
| Hyogo                  | Amagasaki                                                                                                                                                               |                                                                                                       |
| Tottori                | Yonago, Sakaiminato, Daisen, Houki, Nanbu, Kofu, Hino, Nichinan and Hiezu                                                                                               |                                                                                                       |
| Kochi                  | Kochi, Nankoku, Shimanto and Yusuhara                                                                                                                                   | Konan, Kami, Sukumo, Tosashimizu, Kuroshio, Otsuki and Mihara (from Mar 2012)                         |
| Fukuoka                | Kitakyushu city (Yahatanishi-ku) and Fukuoka city (Higashi-ku)                                                                                                          |                                                                                                       |
| South Kyushu / Okinawa | Minamata, Tsunagi, Ashikita, Amakusa, Reihoku, Kamiamakusa, Hitoyoshi, Nishiki, Asagiri, Taragi, Yunomae, Mizukami, Sagara, Itsuki, Yamae, Kuma, Nobeoka and Miyakojima |                                                                                                       |

**eTable 2.** Baseline profiles of the mothers according to Regional Centres in the Japan Environment and Children's Study, 2011–2014

|                                                                         | Hokkaido   | Miyagi     | Fukushima  | Chiba      | Kanagawa   | Koshin     | Toyama     | Aichi      | Kyoto      | Osaka      | Hyogo      | Tottori    | Kochi      | Fukuoka    | South Kyushu / Okinawa |
|-------------------------------------------------------------------------|------------|------------|------------|------------|------------|------------|------------|------------|------------|------------|------------|------------|------------|------------|------------------------|
| Variables                                                               | (%)        | (%)        | (%)        | (%)        | (%)        | (%)        | (%)        | (%)        | (%)        | (%)        | (%)        | (%)        | (%)        | (%)        | (%)                    |
| Number of pregnancies                                                   | 7,970      | 9,130      | 12,882     | 5,952      | 6,473      | 7,175      | 5,451      | 5,568      | 3,920      | 7,861      | 5,085      | 3,026      | 6,984      | 7,553      | 5,748                  |
| Age at delivery, years                                                  |            |            |            |            |            |            |            |            |            |            |            |            |            |            |                        |
| Total, mean (SD)                                                        | 31.4 (4.9) | 30.2 (5.1) | 30.6 (5.1) | 31.1 (5.0) | 31.9 (5.1) | 31.5 (5.1) | 31.8 (4.8) | 31.6 (4.9) | 32.2 (4.8) | 30.8 (5.4) | 31.5 (5.0) | 31.4 (5.0) | 31.3 (5.0) | 31.5 (5.0) | 30.5 (5.2)             |
| <25                                                                     | 8.6        | 14.7       | 12.3       | 9.7        | 7.9        | 8.9        | 6.4        | 7.6        | 5.7        | 13.4       | 9.0        | 8.8        | 8.6        | 8.9        | 12.8                   |
| 25–29                                                                   | 26.7       | 31.0       | 30.2       | 28.2       | 24.2       | 26.2       | 26.6       | 25.9       | 23.3       | 27.0       | 25.9       | 26.8       | 28.2       | 25.8       | 30.4                   |
| 30–34                                                                   | 37.1       | 33.2       | 34.3       | 34.8       | 36.0       | 35.8       | 36.1       | 37.4       | 38.0       | 32.5       | 36.0       | 36.5       | 36.0       | 36.6       | 33.0                   |
| ≥35                                                                     | 27.6       | 21.1       | 23.3       | 27.3       | 31.9       | 29.1       | 30.9       | 29.1       | 33.0       | 27.1       | 29.1       | 27.9       | 27.2       | 28.8       | 23.8                   |
| Marital status                                                          |            |            |            |            |            |            |            |            |            |            |            |            |            |            |                        |
| Married                                                                 | 94.8       | 94.7       | 95.7       | 96.5       | 96.2       | 95.7       | 97.5       | 97.1       | 97.3       | 94.4       | 96.5       | 96.6       | 94.7       | 95.1       | 95.0                   |
| Unmarried                                                               | 4.4        | 4.3        | 3.6        | 2.9        | 3.3        | 3.6        | 2.1        | 2.3        | 2.3        | 4.5        | 2.6        | 2.3        | 4.1        | 3.8        | 3.8                    |
| Divorced/widowed                                                        | 0.9        | 1.0        | 0.7        | 0.7        | 0.5        | 0.7        | 0.4        | 0.6        | 0.5        | 1.1        | 0.9        | 1.1        | 1.2        | 1.1        | 1.1                    |
| Family composition                                                      |            |            |            |            |            |            |            |            |            |            |            |            |            |            |                        |
| One-person households                                                   | 1.6        | 0.4        | 0.8        | 0.5        | 0.3        | 0.5        | 0.3        | 0.4        | 0.5        | 0.5        | 0.4        | 0.3        | 1.4        | 0.8        | 0.6                    |
| A couple only                                                           | 38.9       | 19.7       | 26.8       | 29.2       | 36.1       | 31.3       | 30.8       | 34.1       | 33.3       | 30.3       | 38.7       | 28.3       | 34.0       | 33.9       | 21.8                   |
| A couple with their child(ren)                                          | 47.4       | 31.1       | 37.2       | 45.8       | 48.8       | 41.8       | 40.7       | 47.8       | 47.9       | 50.3       | 50.2       | 40.2       | 46.9       | 52.4       | 47.8                   |
| A parent with her child(ren)                                            | 1.0        | 0.7        | 0.8        | 0.4        | 0.6        | 0.7        | 0.6        | 0.8        | 0.8        | 1.1        | 0.8        | 0.8        | 1.3        | 1.2        | 1.2                    |
| Other households                                                        | 11.0       | 48.1       | 34.4       | 24.2       | 14.2       | 25.8       | 27.7       | 17.0       | 17.5       | 17.8       | 9.9        | 30.4       | 16.5       | 11.6       | 28.6                   |
| Educational background, years                                           |            |            |            |            |            |            |            |            |            |            |            |            |            |            |                        |
| <10                                                                     | 4.3        | 5.5        | 4.3        | 4.6        | 4.4        | 3.8        | 3.1        | 5.2        | 2.5        | 7.7        | 5.8        | 5.0        | 4.4        | 5.8        | 5.5                    |
| 10–12                                                                   | 30.4       | 47.5       | 39.7       | 33.4       | 24.2       | 27.2       | 23.2       | 26.6       | 16.9       | 30.5       | 25.6       | 32.3       | 26.6       | 25.6       | 42.3                   |
| 13–16                                                                   | 63.6       | 46.6       | 55.4       | 60.8       | 68.5       | 67.2       | 71.9       | 66.5       | 75.7       | 61.0       | 66.9       | 61.4       | 67.6       | 66.8       | 51.7                   |
| ≥17                                                                     | 1.8        | 0.4        | 0.7        | 1.2        | 2.9        | 1.3        | 1.9        | 1.7        | 5.0        | 0.9        | 1.7        | 1.3        | 1.4        | 1.9        | 0.6                    |
| Paternal educational background, years                                  |            |            |            |            |            |            |            |            |            |            |            |            |            |            |                        |
| <10                                                                     | 5.6        | 8.6        | 6.2        | 6.7        | 6.2        | 5.4        | 5.0        | 7.3        | 4.6        | 12.1       | 8.4        | 8.1        | 9.3        | 7.6        | 7.4                    |
| 10–12                                                                   | 31.0       | 51.7       | 46.8       | 39.8       | 27.1       | 34.2       | 30.8       | 26.9       | 23.4       | 37.3       | 30.7       | 41.8       | 33.8       | 29.9       | 49.5                   |
| 13–16                                                                   | 58.1       | 38.0       | 44.7       | 49.2       | 58.9       | 56.3       | 57.3       | 59.7       | 60.8       | 47.8       | 54.8       | 45.7       | 53.7       | 56.3       | 41.0                   |
| ≥17                                                                     | 5.3        | 1.7        | 2.3        | 4.3        | 7.9        | 4.0        | 6.9        | 6.1        | 11.2       | 2.8        | 6.0        | 4.5        | 3.1        | 6.2        | 2.1                    |
| Household income, million Japanese-yen/year                             |            |            |            |            |            |            |            |            |            |            |            |            |            |            |                        |
| <2                                                                      | 5.7        | 7.4        | 5.4        | 3.7        | 2.6        | 4.7        | 2.1        | 2.8        | 4.0        | 6.9        | 3.7        | 4.9        | 9.2        | 5.4        | 14.4                   |
| 2 to <4                                                                 | 37.2       | 39.9       | 37.8       | 32.1       | 25.0       | 36.6       | 25.9       | 27.5       | 28.9       | 37.1       | 31.8       | 35.8       | 36.2       | 31.9       | 45.2                   |
| 4 to <6                                                                 | 32.9       | 29.4       | 32.4       | 35.2       | 35.6       | 32.6       | 36.6       | 37.3       | 33.0       | 33.1       | 34.8       | 33.2       | 30.9       | 35.1       | 26.4                   |
| 6 to <8                                                                 | 14.9       | 12.6       | 15.0       | 17.2       | 20.3       | 15.7       | 21.8       | 19.3       | 17.4       | 14.2       | 17.6       | 15.8       | 16.1       | 16.4       | 8.7                    |
| 8 to <10                                                                | 5.6        | 5.9        | 5.6        | 7.0        | 9.7        | 6.4        | 8.6        | 8.4        | 9.0        | 6.0        | 7.9        | 6.2        | 5.0        | 6.9        | 3.0                    |
| ≥10                                                                     | 3.8        | 4.9        | 3.8        | 4.9        | 6.8        | 4.0        | 5.1        | 4.8        | 7.7        | 2.8        | 4.2        | 4.2        | 2.7        | 4.4        | 2.3                    |
| Occupation in early pregnancy                                           |            |            |            |            |            |            |            |            |            |            |            |            |            |            |                        |
| Administrative and managerial workers                                   | 0.4        | 0.7        | 0.6        | 0.5        | 0.3        | 0.6        | 0.5        | 0.4        | 0.4        | 0.7        | 0.5        | 0.6        | 0.9        | 0.7        | 0.8                    |
| Professional and engineering workers                                    | 22.3       | 19.4       | 22.6       | 22.7       | 19.6       | 22.0       | 27.7       | 17.2       | 26.6       | 18.6       | 18.3       | 24.7       | 29.7       | 22.1       | 25.2                   |
| Clerical workers                                                        | 14.5       | 16.1       | 17.2       | 14.0       | 15.5       | 16.2       | 21.3       | 17.8       | 15.6       | 14.4       | 18.6       | 16.3       | 19.6       | 17.2       | 18.7                   |
| Sales workers                                                           | 5.9        | 6.5        | 5.4        | 5.5        | 6.2        | 4.8        | 4.9        | 6.1        | 4.9        | 6.1        | 5.8        | 7.4        | 6.5        | 6.4        | 6.0                    |
| Service workers                                                         | 14.5       | 18.0       | 16.7       | 16.2       | 14.0       | 15.4       | 14.9       | 12.6       | 13.5       | 15.5       | 14.4       | 20.5       | 17.5       | 13.8       | 20.6                   |
| Security workers                                                        | 0.3        | 0.1        | 0.4        | 0.3        | 0.4        | 0.2        | 0.3        | 0.2        | 0.2        | 0.3        | 0.1        | 0.3        | 0.3        | 0.2        | 0.1                    |
| Agriculture, forestry and fishery workers                               | 0.9        | 0.7        | 0.4        | 0.8        | 0.2        | 0.6        | 0.2        | 0.1        | 0.2        | 0.2        | 0.0        | 0.4        | 0.8        | 0.1        | 1.3                    |
| Manufacturing process workers                                           | 1.0        | 7.9        | 6.2        | 1.5        | 1.7        | 5.5        | 5.8        | 2.0        | 2.3        | 2.4        | 1.5        | 2.7        | 1.3        | 1.3        | 3.6                    |
| Transport and machine operation workers                                 | 0.2        | 0.2        | 0.2        | 0.2        | 0.2        | 0.1        | 0.2        | 0.2        | 0.1        | 0.3        | 0.3        | 0.2        | 0.2        | 0.2        | 0.1                    |
| Construction and mining workers                                         | 0.1        | 0.2        | 0.1        | 0.1        | 0.1        | 0.1        | 0.0        | 0.1        | 0.0        | 0.0        | 0.0        | 0.0        | 0.0        | 0.0        | 0.1                    |
| Carrying, cleaning, packaging, and related workers                      | 0.6        | 0.8        | 0.5        | 0.5        | 0.9        | 0.3        | 0.7        | 0.7        | 0.4        | 1.2        | 0.6        | 1.1        | 0.8        | 0.9        | 0.6                    |
| Homemaker                                                               | 34.4       | 24.6       | 25.4       | 33.1       | 36.4       | 29.3       | 20.1       | 38.1       | 31.1       | 34.8       | 34.9       | 21.8       | 18.1       | 32.3       | 18.9                   |
| Others (students, inoccupation, workers not classifiable by occupation) | 5.0        | 4.9        | 4.5        | 4.9        | 4.6        | 4.8        | 3.5        | 4.7        | 4.7        | 5.6        | 5.0        | 3.8        | 4.4        | 4.9        | 4.3                    |
| Smoking habits                                                          |            |            |            |            |            |            |            |            |            |            |            |            |            |            |                        |
| Never smoked                                                            | 51.6       | 50.3       | 55.6       | 55.9       | 60.1       | 60.1       | 63.2       | 65.6       | 67.2       | 54.7       | 61.0       | 62.3       | 61.4       | 58.8       | 57.7                   |
| Ex-smokers who quit before pregnancy                                    | 27.8       | 24.5       | 24.3       | 26.4       | 23.2       | 24.5       | 23.8       | 22.2       | 22.1       | 23.3       | 23.6       | 23.6       | 20.1       | 23.2       | 22.2                   |
| Smokers during early pregnancy                                          | 20.6       | 25.3       | 20.2       | 17.7       | 16.8       | 15.4       | 13.0       | 12.1       | 10.7       | 22.0       | 15.4       | 14.2       | 18.5       | 18.0       | 20.2                   |
| Passive smoking (presence of smokers at home) <sup>a</sup>              |            |            |            |            |            |            |            |            |            |            |            |            |            |            |                        |
| No                                                                      | 78.4       | 75.7       | 81.5       | 85.2       | 86.9       | 86.6       | 86.7       | 89.2       | 88.8       | 80.4       | 84.5       | 85.3       | 82.3       | 84.5       | 80.5                   |
| Yes                                                                     | 21.6       | 24.3       | 18.5       | 14.8       | 13.1       | 13.4       | 13.3       | 10.8       | 11.2       | 19.6       | 15.6       | 14.7       | 17.7       | 15.5       | 19.5                   |
| Alcohol consumption                                                     |            |            |            |            |            |            |            |            |            |            |            |            |            |            |                        |
| Never drank                                                             | 27.3       | 33.9       | 33.6       | 34.8       | 32.1       | 36.7       | 36.4       | 40.6       | 37.0       | 39.6       | 32.7       | 40.7       | 32.5       | 35.1       | 32.2                   |
| Ex-drinkers who quit before pregnancy                                   | 19.1       | 19.0       | 18.7       | 23.1       | 18.5       | 20.6       | 18.7       | 20.9       | 19.4       | 18.9       | 19.2       | 20.2       | 20.3       | 18.8       | 20.0                   |
| Drinkers during early pregnancy                                         | 53.6       | 47.1       | 47.8       | 42.2       | 49.4       | 42.6       | 44.9       | 38.5       | 43.7       | 41.5       | 48.1       | 39.1       | 47.2       | 46.1       | 47.9                   |
| Body mass index before pregnancy                                        |            |            |            |            |            |            |            |            |            |            |            |            |            |            |                        |
| <18.5 kg/m <sup>2</sup>                                                 | 17.2       | 13.9       | 14.5       | 14.5       | 15.4       | 17.2       | 17.4       | 17.0       | 18.4       | 17.5       | 15.1       | 18.7       | 15.8       | 19.3       | 14.2                   |
| 18.5–24.9 kg/m <sup>2</sup>                                             | 72.4       | 71.7       | 72.6       | 73.2       | 75.0       | 73.1       | 75.1       | 73.8       | 74.4       | 72.0       | 74.9       | 71.8       | 74.0       | 71.7       | 71.8                   |
| ≥25 kg/m <sup>2</sup>                                                   | 10.4       | 14.5       | 12.8       | 12.4       | 9.7        | 9.7        | 7.5        | 9.2        | 7.2        | 10.5       | 10.0       | 9.6        | 10.3       | 9.0        | 13.9                   |
| Parity                                                                  |            |            |            |            |            |            |            |            |            |            |            |            |            |            |                        |
| 0                                                                       | 45.5       | 39.7       | 41.6       | 39.7       | 43.9       | 42.7       | 41.8       | 41.5       | 42.3       | 40.7       | 44.3       | 40.2       | 43.2       | 40.6       | 33.5                   |
| 1                                                                       | 38.8       | 37.6       | 37.5       | 38.9       | 39.3       | 37.9       | 40.9       | 40.4       | 39.9       | 38.4       | 38.2       | 36.8       | 37.1       | 38.0       | 34.2                   |
| ≥2                                                                      | 15.8       | 22.7       | 21.0       | 21.4       | 16.9       | 19.4       | 17.3       | 18.1       | 17.8       | 20.9       | 17.6       | 23.1       | 19.8       | 21.4       | 32.3                   |

SD, standard deviation

<sup>a</sup> Excluding smokers during early pregnancy.

**eTable 3.** Baseline profiles of the fathers according to Regional Centres in the Japan Environment and Children's Study, 2011–2014

|                                                                         | Hokkaido   | Miyagi     | Fukushima  | Chiba      | Kanagawa   | Koshin     | Toyama     | Aichi      | Kyoto      | Osaka      | Hyogo      | Tottori    | Kochi      | Fukuoka    | South Kyushu /<br>Okinawa |
|-------------------------------------------------------------------------|------------|------------|------------|------------|------------|------------|------------|------------|------------|------------|------------|------------|------------|------------|---------------------------|
| Variables                                                               | (%)        | (%)        | (%)        | (%)        | (%)        | (%)        | (%)        | (%)        | (%)        | (%)        | (%)        | (%)        | (%)        | (%)        | (%)                       |
| Number of their partner's pregnancies                                   | 2,817      | 4,143      | 8,632      | 3,864      | 2,418      | 5,001      | 3,259      | 2,547      | 3,106      | 2,975      | 1,868      | 1,148      | 2,372      | 3,784      | 3,468                     |
| Age when their children were born, years                                |            |            |            |            |            |            |            |            |            |            |            |            |            |            |                           |
| Total, mean (SD)                                                        | 33.1 (5.8) | 31.6 (6.0) | 32.4 (5.9) | 33.3 (5.8) | 33.6 (5.8) | 33.3 (5.8) | 33.4 (5.6) | 33.6 (5.6) | 34.3 (5.7) | 32.1 (6.2) | 32.8 (5.3) | 33.0 (5.8) | 32.6 (5.7) | 32.9 (5.8) | 32.3 (6.0)                |
| <25                                                                     | 5.4        | 11.1       | 8.0        | 5.4        | 4.8        | 5.4        | 4.2        | 4.1        | 3.1        | 10.8       | 5.4        | 5.6        | 5.9        | 6.3        | 8.4                       |
| 25–29                                                                   | 22.8       | 26.9       | 24.9       | 21.8       | 20.0       | 21.1       | 21.5       | 19.4       | 16.3       | 24.6       | 22.7       | 22.9       | 25.7       | 21.3       | 26.1                      |
| 30–34                                                                   | 33.4       | 32.8       | 32.7       | 32.8       | 31.6       | 32.7       | 33.2       | 35.4       | 34.2       | 30.4       | 35.9       | 33.4       | 31.8       | 34.8       | 31.9                      |
| ≥35                                                                     | 38.4       | 29.2       | 34.4       | 40.1       | 43.6       | 40.8       | 41.1       | 41.1       | 46.4       | 34.3       | 36.1       | 38.1       | 36.6       | 37.7       | 33.6                      |
| Occupation during their partner's early pregnancy                       |            |            |            |            |            |            |            |            |            |            |            |            |            |            |                           |
| Administrative and managerial workers                                   | 4.5        | 3.9        | 4.1        | 4.1        | 4.0        | 4.2        | 3.4        | 4.0        | 5.0        | 3.9        | 3.8        | 2.3        | 4.0        | 4.4        | 4.5                       |
| Professional and engineering workers                                    | 28.7       | 23.7       | 27.6       | 31.1       | 35.1       | 31.0       | 34.1       | 33.1       | 38.4       | 26.8       | 32.2       | 25.8       | 31.6       | 30.8       | 28.8                      |
| Clerical workers                                                        | 11.7       | 7.9        | 9.5        | 8.0        | 9.9        | 9.7        | 9.1        | 11.4       | 10.0       | 7.9        | 8.9        | 8.5        | 9.9        | 8.8        | 9.0                       |
| Sales workers                                                           | 14.4       | 9.3        | 9.2        | 8.9        | 13.3       | 9.3        | 9.8        | 15.6       | 10.0       | 11.2       | 16.2       | 10.3       | 11.8       | 13.2       | 8.0                       |
| Service workers                                                         | 15.7       | 11.1       | 9.8        | 11.8       | 11.8       | 11.5       | 7.5        | 9.6        | 11.0       | 11.8       | 12.0       | 14.7       | 14.5       | 10.5       | 13.6                      |
| Security workers                                                        | 6.9        | 3.3        | 4.5        | 6.3        | 5.0        | 3.1        | 2.7        | 3.3        | 3.1        | 4.1        | 2.2        | 9.0        | 5.0        | 3.9        | 2.9                       |
| Agriculture, forestry and fishery workers                               | 2.3        | 3.4        | 1.7        | 2.7        | 0.3        | 1.7        | 1.1        | 0.0        | 0.8        | 1.0        | 0.2        | 2.6        | 3.5        | 0.1        | 5.9                       |
| Manufacturing process workers                                           | 3.6        | 17.5       | 18.6       | 12.2       | 7.3        | 17.7       | 19.2       | 10.3       | 11.1       | 14.2       | 11.2       | 12.5       | 6.0        | 12.1       | 11.2                      |
| Transport and machine operation workers                                 | 3.8        | 5.4        | 3.7        | 5.2        | 4.4        | 3.0        | 3.7        | 4.3        | 2.8        | 6.0        | 3.5        | 5.8        | 3.8        | 4.6        | 3.9                       |
| Construction and mining workers                                         | 4.2        | 10.6       | 8.0        | 6.5        | 4.9        | 5.8        | 7.0        | 5.0        | 3.8        | 7.9        | 6.3        | 5.6        | 5.7        | 7.5        | 9.0                       |
| Carrying, cleaning, packaging, and related workers                      | 0.9        | 1.8        | 1.7        | 1.8        | 1.1        | 1.5        | 1.3        | 1.9        | 1.5        | 2.8        | 1.9        | 1.4        | 1.7        | 1.8        | 1.8                       |
| Homemaker                                                               | 0.3        | 0.1        | 0.1        | 0.1        | 0.1        | 0.2        | 0.1        | 0.1        | 0.1        | 0.0        | 0.2        | 0.2        | 0.1        | 0.2        | 0.1                       |
| Others (students, inoccupation, workers not classifiable by occupation) | 3.2        | 2.1        | 1.5        | 1.2        | 2.9        | 1.5        | 1.1        | 1.4        | 2.5        | 2.3        | 1.5        | 1.5        | 2.4        | 2.1        | 1.5                       |
| Smoking habits                                                          |            |            |            |            |            |            |            |            |            |            |            |            |            |            |                           |
| Never smoked                                                            | 28.8       | 19.9       | 24.8       | 29.1       | 33.7       | 27.6       | 32.6       | 39.1       | 38.7       | 27.6       | 36.1       | 30.4       | 30.2       | 28.0       | 23.0                      |
| Ex-smokers who quit before their partner's pregnancy                    | 25.8       | 18.2       | 21.5       | 26.3       | 25.1       | 25.1       | 24.7       | 26.7       | 26.6       | 23.7       | 24.2       | 26.7       | 22.8       | 22.9       | 21.6                      |
| Smokers during their partner's early pregnancy                          | 45.5       | 61.9       | 53.7       | 44.5       | 41.2       | 47.3       | 42.7       | 34.3       | 34.7       | 48.7       | 39.8       | 42.9       | 47.0       | 49.1       | 55.4                      |
| Alcohol consumption                                                     |            |            |            |            |            |            |            |            |            |            |            |            |            |            |                           |
| Never drank                                                             | 19.4       | 20.1       | 19.6       | 20.1       | 22.3       | 21.9       | 21.0       | 26.8       | 21.5       | 24.8       | 22.8       | 24.2       | 22.2       | 22.9       | 16.4                      |
| Ex-drinkers                                                             | 4.1        | 4.0        | 3.7        | 4.0        | 3.7        | 3.8        | 3.4        | 4.3        | 3.9        | 4.2        | 3.0        | 3.9        | 4.6        | 3.4        | 2.9                       |
| Drinkers                                                                | 76.5       | 75.9       | 76.7       | 75.9       | 74.0       | 74.4       | 75.6       | 68.9       | 74.6       | 71.0       | 74.3       | 71.9       | 73.2       | 73.7       | 80.7                      |
| Body mass index before pregnancy                                        |            |            |            |            |            |            |            |            |            |            |            |            |            |            |                           |
| <18.5 kg/m <sup>2</sup>                                                 | 3.7        | 3.7        | 3.5        | 2.6        | 4.1        | 3.6        | 3.4        | 4.2        | 3.6        | 3.1        | 4.2        | 5.0        | 4.1        | 4.1        | 3.3                       |
| 18.5–24.9 kg/m <sup>2</sup>                                             | 67.9       | 64.9       | 67.6       | 67.1       | 71.1       | 71.0       | 74.5       | 71.6       | 73.8       | 69.0       | 71.5       | 71.7       | 68.6       | 68.4       | 64.6                      |
| ≥25 kg/m <sup>2</sup>                                                   | 28.4       | 31.4       | 28.9       | 30.3       | 24.8       | 25.4       | 22.1       | 24.3       | 22.5       | 27.9       | 24.3       | 23.4       | 27.3       | 27.6       | 32.2                      |

SD, standard deviation

**eTable 4.** Baseline profiles of the children according to Regional Centres in the Japan Environment and Children's Study, 2011–2014

| Variables                      | Hokkaido    | Miyagi      | Fukushima   | Chiba       | Kanagawa    | Koshin      | Toyama      | Aichi       | Kyoto       | Osaka       | Hyogo       | Tottori     | Kochi       | Fukuoka     | South Kyushu / Okinawa |
|--------------------------------|-------------|-------------|-------------|-------------|-------------|-------------|-------------|-------------|-------------|-------------|-------------|-------------|-------------|-------------|------------------------|
| Number of live births          | 7904        | 9053        | 12857       | 5942        | 6393        | 7162        | 5392        | 5535        | 3901        | 7838        | 5044        | 3033        | 6883        | 7519        | 5692                   |
| Singleton births, %            | 98.2        | 98.3        | 98.1        | 97.9        | 98.6        | 98.2        | 98.5        | 98.2        | 97.7        | 97.5        | 98.2        | 97.5        | 98.5        | 97.7        | 98.3                   |
| Gestational age at birth       |             |             |             |             |             |             |             |             |             |             |             |             |             |             |                        |
| Total, weeks, mean (SD)        | 39.1 (1.7)  | 39.1 (1.7)  | 39.3 (1.6)  | 39.0 (1.7)  | 39.2 (1.6)  | 39.1 (1.6)  | 39.3 (1.6)  | 39.2 (1.7)  | 39.2 (1.6)  | 39.2 (1.7)  | 39.2 (1.7)  | 39.3 (1.6)  | 39.1 (1.7)  | 39.2 (1.7)  | 39.1 (1.6)             |
| Preterm births (<37 weeks), %  | 6.1         | 6.0         | 5.1         | 6.2         | 5.4         | 5.4         | 4.9         | 5.8         | 5.5         | 5.8         | 5.3         | 4.4         | 5.9         | 5.6         | 5.9                    |
| Term births (37–41 weeks), %   | 93.8        | 93.9        | 94.7        | 93.6        | 94.5        | 94.5        | 94.6        | 93.8        | 94.4        | 93.8        | 94.3        | 95.1        | 93.9        | 94.0        | 94.0                   |
| Postterm births (≥42 weeks), % | 0.1         | 0.1         | 0.1         | 0.2         | 0.1         | 0.2         | 0.5         | 0.4         | 0.1         | 0.4         | 0.4         | 0.5         | 0.1         | 0.4         | 0.2                    |
| Sex                            |             |             |             |             |             |             |             |             |             |             |             |             |             |             |                        |
| Male, %                        | 51.1        | 51.2        | 51.6        | 51.4        | 52.4        | 50.3        | 51.2        | 51.2        | 51.2        | 51.4        | 52.4        | 49.5        | 50.8        | 50.9        | 51.7                   |
| Female, %                      | 48.9        | 48.8        | 48.5        | 48.7        | 47.6        | 49.8        | 48.8        | 48.8        | 48.8        | 48.6        | 47.6        | 50.5        | 49.2        | 49.1        | 48.3                   |
| Type of delivery               |             |             |             |             |             |             |             |             |             |             |             |             |             |             |                        |
| Vaginal, %                     | 78.6        | 81.4        | 79.3        | 78.3        | 84.7        | 81.5        | 82.8        | 80.5        | 79.2        | 79.5        | 78.7        | 80.6        | 74.0        | 81.4        | 78.0                   |
| Caesarean, %                   | 21.4        | 18.6        | 20.7        | 21.7        | 15.3        | 18.5        | 17.3        | 19.6        | 20.8        | 20.5        | 21.3        | 19.4        | 26.0        | 18.6        | 22.1                   |
| Birth weight, g                |             |             |             |             |             |             |             |             |             |             |             |             |             |             |                        |
| Total, mean (SD)               | 3,019 (439) | 3,039 (450) | 3,013 (427) | 2,998 (434) | 2,998 (418) | 2,975 (426) | 3,014 (422) | 3,021 (438) | 3,018 (420) | 3,001 (433) | 3,016 (440) | 2,994 (425) | 2,979 (425) | 2,994 (445) | 3,043 (449)            |
| Singleton births               |             |             |             |             |             |             |             |             |             |             |             |             |             |             |                        |
| Total, mean (SD)               | 3,034 (423) | 3,053 (436) | 3,027 (415) | 3,015 (414) | 3,008 (408) | 2,988 (412) | 3,025 (412) | 3,035 (426) | 3,035 (404) | 3,019 (418) | 3,032 (423) | 3,013 (405) | 2,992 (411) | 3,013 (425) | 3,054 (441)            |
| Low birth weight (<2,500 g), % | 7.7         | 7.7         | 7.8         | 8.5         | 8.6         | 9.2         | 7.5         | 7.9         | 7.4         | 8.2         | 7.6         | 8.7         | 8.9         | 8.6         | 7.6                    |
| Birth height, cm               |             |             |             |             |             |             |             |             |             |             |             |             |             |             |                        |
| Total, mean (SD)               | 48.7 (2.5)  | 49.3 (2.5)  | 49.0 (2.4)  | 48.4 (2.4)  | 49.0 (2.2)  | 49.1 (2.3)  | 48.6 (2.2)  | 49.6 (2.3)  | 48.7 (2.3)  | 48.2 (2.3)  | 48.7 (2.4)  | 48.2 (2.4)  | 48.5 (2.4)  | 49.1 (2.6)  | 48.8 (2.3)             |
| Singleton births, mean (SD)    | 48.8 (2.4)  | 49.3 (2.4)  | 49.0 (2.3)  | 48.5 (2.3)  | 49.1 (2.1)  | 49.2 (2.3)  | 48.7 (2.2)  | 49.7 (2.3)  | 48.8 (2.2)  | 48.3 (2.2)  | 48.8 (2.3)  | 48.3 (2.3)  | 48.6 (2.3)  | 49.2 (2.4)  | 48.8 (2.3)             |
| Birth head circumference, cm   |             |             |             |             |             |             |             |             |             |             |             |             |             |             |                        |
| Total, mean (SD)               | 33.3 (1.5)  | 33.1 (1.6)  | 33.2 (1.5)  | 33.1 (1.5)  | 33.3 (1.5)  | 33.1 (1.6)  | 33.1 (1.5)  | 33.0 (1.5)  | 33.2 (1.5)  | 33.2 (1.5)  | 33.3 (1.5)  | 33.1 (1.4)  | 33.1 (1.5)  | 33.1 (1.6)  | 33.1 (1.5)             |
| Singleton births, mean (SD)    | 33.4 (1.5)  | 33.2 (1.6)  | 33.2 (1.5)  | 33.1 (1.5)  | 33.3 (1.5)  | 33.1 (1.5)  | 33.1 (1.5)  | 33.0 (1.5)  | 33.2 (1.5)  | 33.2 (1.5)  | 33.3 (1.5)  | 33.1 (1.4)  | 33.1 (1.5)  | 33.1 (1.5)  | 33.1 (1.5)             |
| Birth chest circumference, g   |             |             |             |             |             |             |             |             |             |             |             |             |             |             |                        |
| Total, mean (SD)               | 31.7 (1.9)  | 31.6 (1.9)  | 31.7 (1.9)  | 31.6 (1.9)  | 31.8 (1.9)  | 31.7 (1.9)  | 31.8 (1.9)  | 31.8 (1.9)  | 31.7 (1.9)  | 31.7 (1.9)  | 31.8 (1.9)  | 31.7 (1.8)  | 31.6 (1.9)  | 31.7 (1.9)  | 31.9 (1.9)             |
| Singleton births, mean (SD)    | 31.8 (1.9)  | 31.7 (1.9)  | 31.7 (1.8)  | 31.7 (1.8)  | 31.9 (1.8)  | 31.7 (1.8)  | 31.8 (1.8)  | 31.9 (1.9)  | 31.7 (1.8)  | 31.8 (1.9)  | 31.9 (1.8)  | 31.8 (1.7)  | 31.7 (1.8)  | 31.7 (1.8)  | 32.0 (1.8)             |

SD, standard deviation
